# Supplementary material
Source: Springer Nature journal article supplement (http://www.springermedizin.de/resource/supplementary/12887_2011_581_MOESM1_ESM.pdf/9475702)

**Figure 1: Flow diagram of study participants**

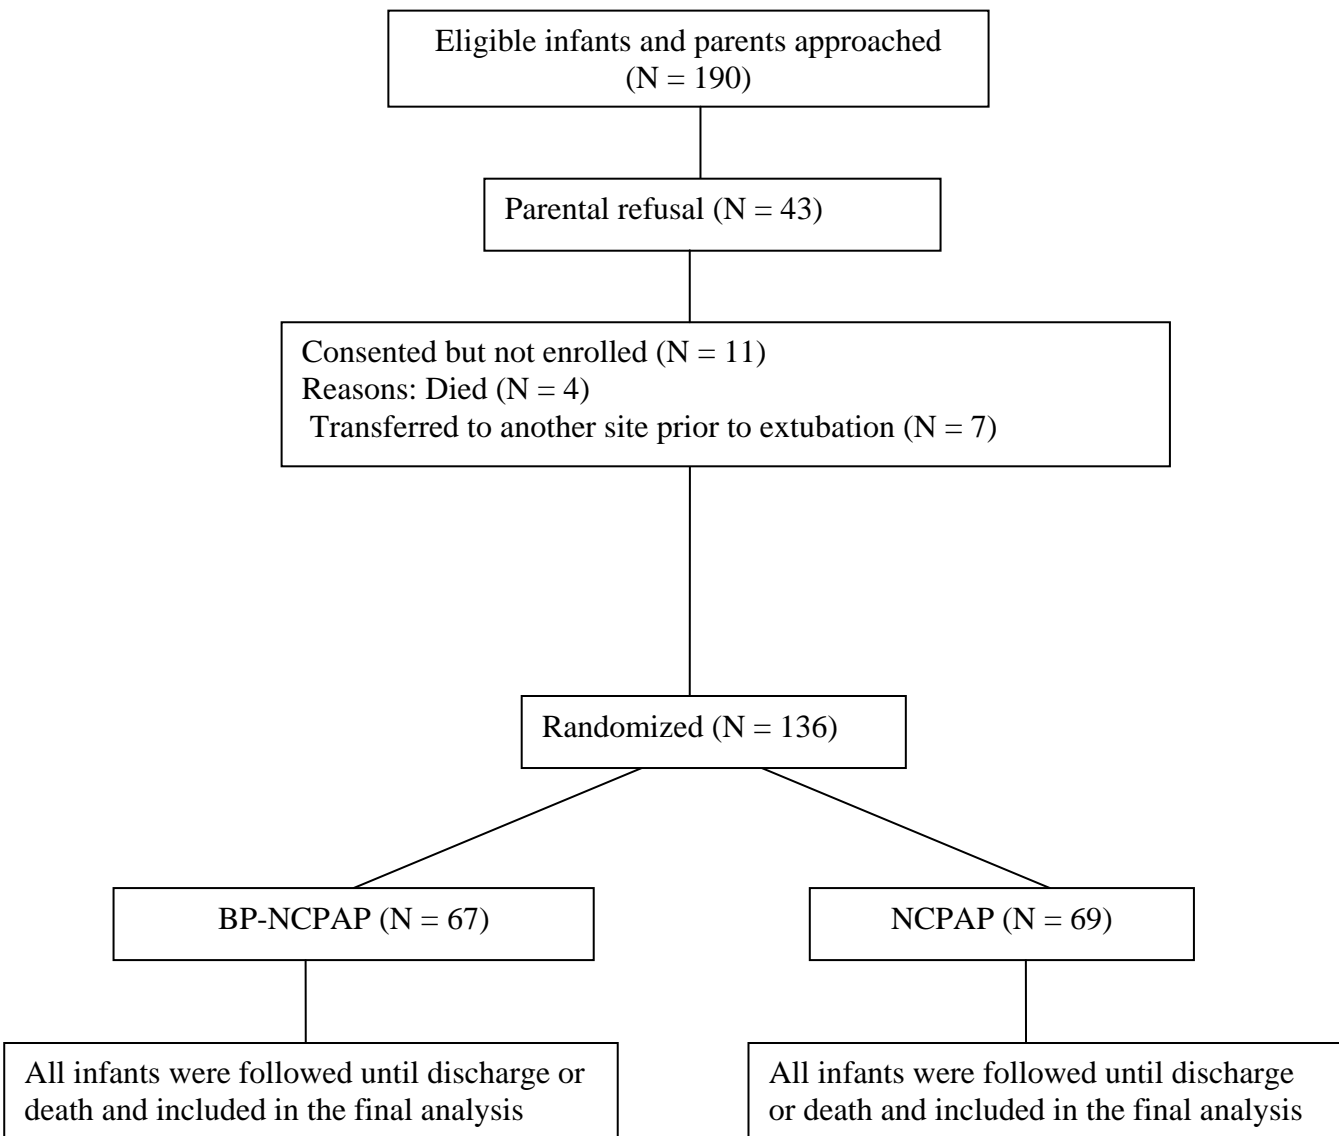

Supplement: MOESM1 [file 9475702]
